# Supplementary material
Source: PubMed Central journal article supplement (PMC9422791)

**Supplemental Figure 1. Adaptations and the frequency of adaptation. Initially basal rates were adapted once a week for 2 weeks, the carbohydrate ratios once a week for up to 5 weeks, then basal rates again for 2 weeks, then the controller parameters once a week.**

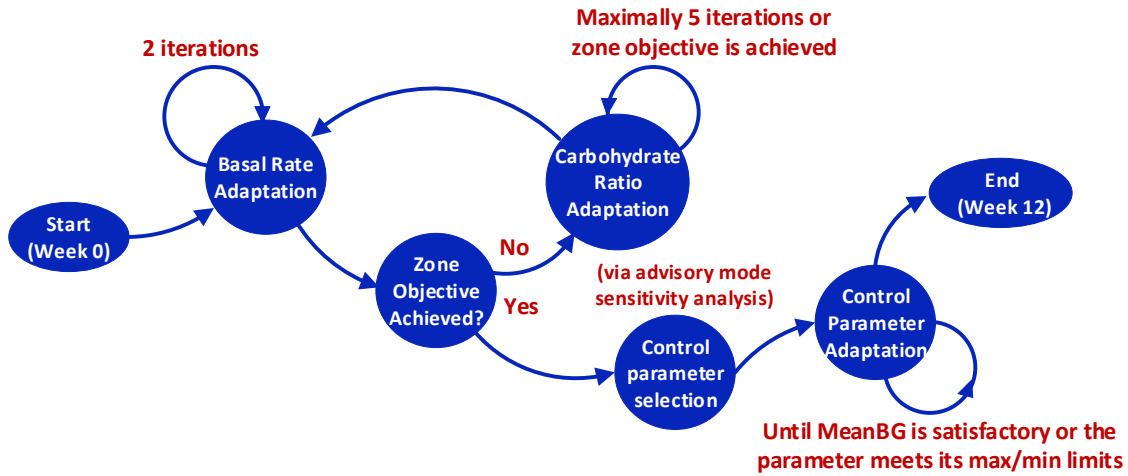

Supplement: Suppl_FigS1.pdf [file Suppl_FigS1.pdf]
