# Supplementary material
Source: PubMed Central journal article supplement (PMC9422791)

**Supplemental Figures 3. Adaptations in the AID Arm: (A) Daily Average Basal Rate, (B) Daily Average Carbohydrate-to-Insulin Ratio, (C) % Time in Range 70-180 mg/dL, and (D) % Time Below 70 mg/dL - Across Both Periods. Black dots denote mean values, horizontal lines in the boxes are medians, and the bottom and top of the boxes represent the 25th and 75th percentiles.**

**A.**

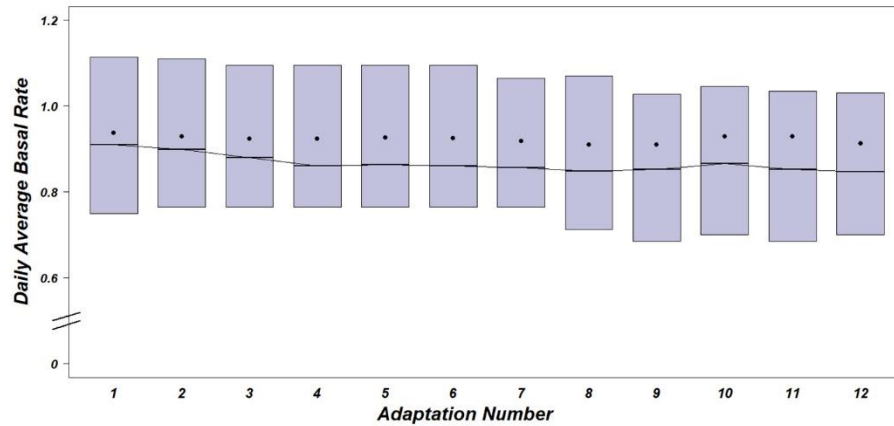

**B.**

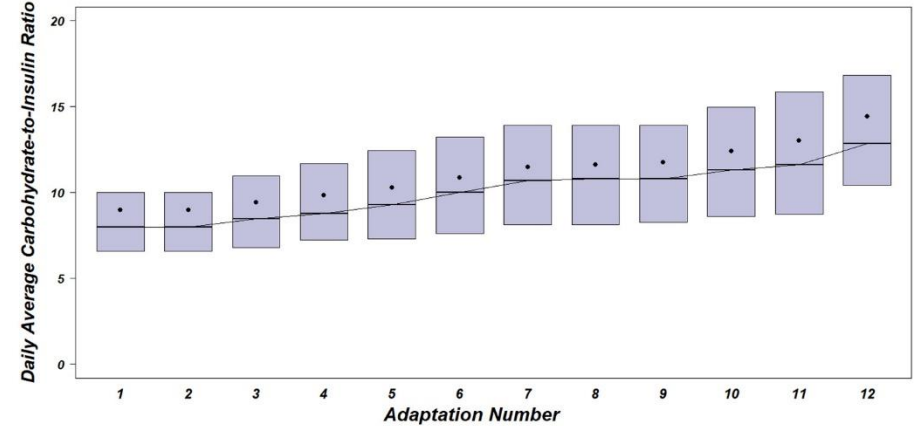

**C.**

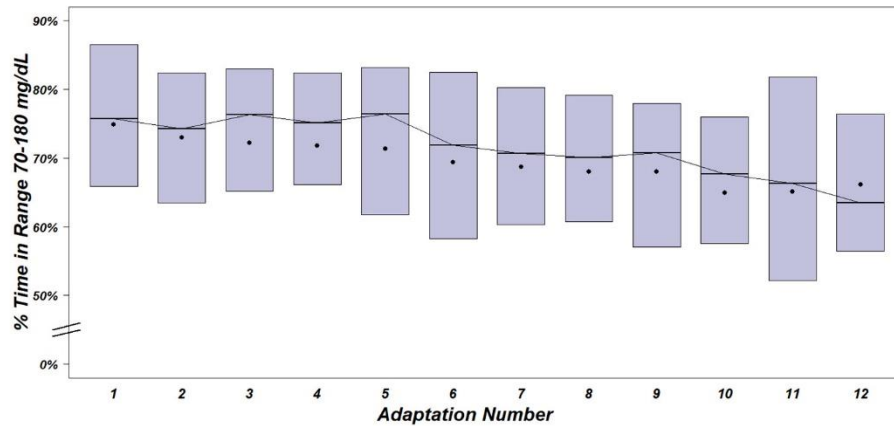

**D.**

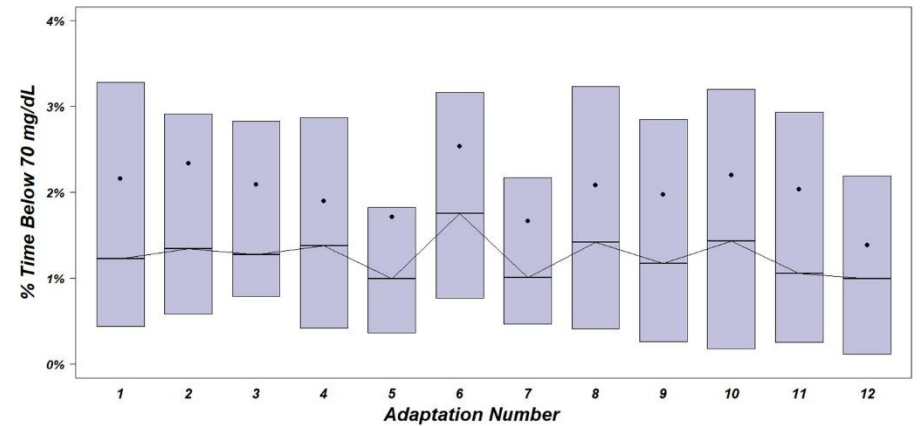

Supplement: Suppl_FigS3.pdf [file Suppl_FigS3.pdf]
