# Supplementary material
Source: PubMed Central journal article supplement (PMC9422791)
Supplement: Suppl_TableS1.pdf [file Suppl_TableS1.pdf]

**Supplemental Table 1. Secondary CGM Metrics during the Daytime (06:00-23:59)**

|                                                           | Baseline<br>N=35     | AID Use Period<br>N=35 | SAP Use Period<br>N=35 | Mean Adjusted<br>Difference [95% CI], P-<br>Value <sup>a</sup> |
|-----------------------------------------------------------|----------------------|------------------------|------------------------|----------------------------------------------------------------|
| <b>Hours of Data</b>                                      |                      |                        |                        |                                                                |
| <i>Median (IQR)</i>                                       | 231 (226, 245)       | 1324 (1247, 1387)      | 1413 (1330, 1455)      |                                                                |
| <b>Overall Glucose Control</b>                            |                      |                        |                        |                                                                |
| Percentage of Time in Target Range 70-180 mg/dL           |                      |                        |                        |                                                                |
| <i>Mean (SD)</i>                                          | 70% (16%)            | 68% (14%)              | 67% (15%)              | 0.8% [-3%, 5%],<br>0.65                                        |
| <i>Median (IQR)</i>                                       | 74% (63%, 80%)       | 69% (61%, 78%)         | 68% (58%, 78%)         |                                                                |
| Percentage of Time in the Tight Target Range 70-140 mg/dL |                      |                        |                        |                                                                |
| <i>Mean (SD)</i>                                          | 45% (17%)            | 44% (14%)              | 44% (17%)              | 0.1% [-.5%, 6%],<br>0.96                                       |
| <i>Median (IQR)</i>                                       | 45% (34%, 52%)       | 43% (36%, 55%)         | 44% (32%, 57%)         |                                                                |
| Mean Glucose (mg/dL)                                      |                      |                        |                        |                                                                |
| <i>Mean (SD)</i>                                          | 154 (29)             | 158 (24)               | 155 (26)               | 4 [-4, 11],<br>0.41                                            |
| <i>Median (IQR)</i>                                       | 151 (140, 164)       | 158 (142, 170)         | 154 (137, 169)         |                                                                |
| Coefficient of Variation                                  |                      |                        |                        |                                                                |
| <i>Mean (SD)</i>                                          | 33.4% (5.0%)         | 34.5% (5.0%)           | 34.6% (5.7%)           | -0.2% [-1.6%, 1.3%],<br>0.81                                   |
| <i>Median (IQR)</i>                                       | 33.8% (31.7%, 36.3%) | 34.6% (31.7%, 38.0%)   | 33.9% (30.3%, 38.8%)   |                                                                |
| Standard Deviation (mg/dL)                                |                      |                        |                        |                                                                |
| <i>Mean (SD)</i>                                          | 51.7 (13.9)          | 55.0 (12.9)            | 53.7 (13.1)            | 1.1 [-2.0, 4.2],<br>0.55                                       |
| <i>Median (IQR)</i>                                       | 49.6 (42.4, 55.3)    | 54.1 (46.5, 60.9)      | 53.8 (46.8, 60.7)      |                                                                |
| Percentage of Time in Target Range 70-180 mg/dL >70%      |                      |                        |                        |                                                                |
| <i>n (%)</i>                                              | 23 (66%)             | 16 (46%)               | 15 (43%)               | 2% [-8%, 13%],<br>0.65                                         |
| <b>Hypoglycemia</b>                                       |                      |                        |                        |                                                                |
| % Time <54 mg/dL                                          |                      |                        |                        |                                                                |
| <i>Mean (SD)</i>                                          | 0.51% (0.81%)        | 0.37% (0.38%)          | 0.65% (0.71%)          | -0.3% [-0.5%, 0.0%],<br>0.02                                   |
| <i>Median (IQR)</i>                                       | 0.22% (0.00%, 0.61%) | 0.21% (0.11%, 0.56%)   | 0.44% (0.11%, 0.98%)   |                                                                |
| % Time <60 mg/dL                                          |                      |                        |                        |                                                                |
| <i>Mean (SD)</i>                                          | 1.01% (1.38%)        | 0.77% (0.77%)          | 1.31% (1.28%)          | -0.5% [-0.9%, -0.2%],                                          |

|                                                                                          |                      |                      |                      |                                |
|------------------------------------------------------------------------------------------|----------------------|----------------------|----------------------|--------------------------------|
| <i>Median (IQR)</i>                                                                      | 0.69% (0.03%, 1.25%) | 0.60% (0.28%, 1.04%) | 1.00% (0.26%, 1.78%) | 0.004                          |
| % Time <70 mg/dL                                                                         |                      |                      |                      |                                |
| <i>Mean (SD)</i>                                                                         | 2.9% (3.1%)          | 2.1% (1.9%)          | 3.4% (2.9%)          | -1.4% [-2.1%, -0.6%],<br>0.001 |
| <i>Median (IQR)</i>                                                                      | 2.5% (0.6%, 3.4%)    | 1.8% (0.9%, 2.6%)    | 3.0% (1.2%, 4.7%)    |                                |
| LBG1                                                                                     |                      |                      |                      |                                |
| <i>Mean (SD)</i>                                                                         | 0.9 (0.7)            | 0.6 (0.5)            | 0.9 (0.7)            | -0.3 [-0.5, -0.1],<br>0.001    |
| <i>Median (IQR)</i>                                                                      | 0.7 (0.3, 1.1)       | 0.6 (0.3, 0.7)       | 0.8 (0.4, 1.4)       |                                |
| Hypoglycemic Event Rate per Week <sup>b</sup>                                            |                      |                      |                      |                                |
| <i>Mean (SD)</i>                                                                         | 1.10 (1.67)          | 0.81 (0.89)          | 1.34 (1.47)          | -0.5 [-1.1, -0.02],<br>0.04    |
| <i>Median (IQR)</i>                                                                      | 0.73 (0.00, 1.48)    | 0.54 (0.13, 1.26)    | 0.89 (0.26, 2.19)    |                                |
| Percentage of Time Below 54 mg/dL <1%                                                    |                      |                      |                      |                                |
| <i>n (%)</i>                                                                             | 29 (83%)             | 32 (91%)             | 27 (77%)             | 14% [-0.2%, 29%],<br>0.05      |
| Percentage of Time in Target Range 70-180 mg/dL >70% and<br>% of Time Below 54 mg/dL <1% |                      |                      |                      |                                |
| <i>n (%)</i>                                                                             | 18 (51%)             | 14 (40%)             | 10 (29%)             | 11% [-1%, 23%],<br>0.07        |
| <b>Hyperglycemia</b>                                                                     |                      |                      |                      |                                |
| % Time >180 mg/dL                                                                        |                      |                      |                      |                                |
| <i>Mean (SD)</i>                                                                         | 27% (17%)            | 30% (15%)            | 29% (16%)            | 0.7% [-4%, 5%],<br>0.69        |
| <i>Median (IQR)</i>                                                                      | 25% (19%, 34%)       | 30% (20%, 38%)       | 28% (17%, 41%)       |                                |
| % Time >250 mg/dL                                                                        |                      |                      |                      |                                |
| <i>Mean (SD)</i>                                                                         | 8% (10%)             | 9% (8%)              | 8% (8%)              | 0.8% [-2%, 3%],<br>0.55        |
| <i>Median (IQR)</i>                                                                      | 4% (2%, 8%)          | 7% (3%, 12%)         | 6% (2%, 10%)         |                                |
| % Time >300 mg/dL                                                                        |                      |                      |                      |                                |
| <i>Mean (SD)</i>                                                                         | 3% (5%)              | 3% (4%)              | 2% (4%)              | 0.2% [-1%, 2%],<br>0.79        |
| <i>Median (IQR)</i>                                                                      | 1% (0%, 2%)          | 2% (1%, 3%)          | 1% (0%, 3%)          |                                |
| HBG1                                                                                     |                      |                      |                      |                                |
| <i>Mean (SD)</i>                                                                         | 6.4 (4.6)            | 6.9 (3.7)            | 6.5 (3.9)            | 0.3 [-0.9, 1.4],<br>0.62       |
| <i>Median (IQR)</i>                                                                      | 5.1 (4.1, 7.2)       | 6.4 (4.3, 9.5)       | 5.8 (3.6, 8.5)       |                                |
| Hyperglycemic Event Rate per Week <sup>c</sup>                                           |                      |                      |                      |                                |
| <i>Mean (SD)</i>                                                                         | 2.25 (3.55)          | 2.86 (3.33)          | 2.20 (2.42)          | 0.3 [-0.7, 1.3],               |

---

| <i>Median (IQR)</i> | 0.83 (0.00, 2.18) | 1.79 (0.52, 3.45) | 1.81 (0.35, 3.40) |
|---------------------|-------------------|-------------------|-------------------|
|---------------------|-------------------|-------------------|-------------------|

---

<sup>a</sup> Based on a repeated-measures least squares regression model adjusting for period as fixed effect and site as random effect. The model includes 3 time points: (1) baseline, (2) period 1 outcome, and (3) period 2 outcome. P-values and confidence intervals were adjusted for multiple comparisons using the Two Stage Benjamini-Hochberg adaptive false discovery rate procedure.

<sup>b</sup> An hypoglycemic event is defined as at least 15min <54 mg/dL. An event ends if at least 15min above 70 mg/dL.

<sup>c</sup> An hyperglycemic event is defined as at least 15min >300 mg/dL. An event ends if at least 15min below 250 mg/dL
