# Supplementary material
Source: PubMed Central journal article supplement (PMC9422791)
Supplement: Suppl_TableS2.pdf [file Suppl_TableS2.pdf]

**Supplemental Table 2. Secondary CGM Metrics during the Nighttime (00:00-05:59)**

|                                                           | Baseline<br>N=35     | AID Use Period<br>N=35 | SAP Use Period<br>N=35 | Mean Adjusted<br>Difference [95% CI], P-<br>Value <sup>a</sup> |
|-----------------------------------------------------------|----------------------|------------------------|------------------------|----------------------------------------------------------------|
| <b>Hours of Data</b>                                      |                      |                        |                        |                                                                |
| <i>Median (IQR)</i>                                       | 78 (76, 83)          | 446 (423, 469)         | 466 (449, 490)         |                                                                |
| <b>Overall Glucose Control</b>                            |                      |                        |                        |                                                                |
| Percentage of Time in Target Range 70-180 mg/dL           |                      |                        |                        |                                                                |
| <i>Mean (SD)</i>                                          | 66% (19%)            | 70% (16%)              | 63% (17%)              | 6% [ 0.6%, 12%],<br>0.03                                       |
| <i>Median (IQR)</i>                                       | 71% (53%, 80%)       | 74% (62%, 81%)         | 61% (52%, 78%)         |                                                                |
| Percentage of Time in the Tight Target Range 70-140 mg/dL |                      |                        |                        |                                                                |
| <i>Mean (SD)</i>                                          | 40% (18%)            | 45% (15%)              | 40% (18%)              | 5% [-2%, 12%],<br>0.11                                         |
| <i>Median (IQR)</i>                                       | 41% (24%, 53%)       | 46% (37%, 53%)         | 36% (27%, 55%)         |                                                                |
| Mean Glucose (mg/dL)                                      |                      |                        |                        |                                                                |
| <i>Mean (SD)</i>                                          | 157 (33)             | 158 (22)               | 161 (31)               | -2 [-12, 8],<br>0.59                                           |
| <i>Median (IQR)</i>                                       | 158 (139, 172)       | 153 (146, 168)         | 165 (138, 180)         |                                                                |
| Coefficient of Variation                                  |                      |                        |                        |                                                                |
| <i>Mean (SD)</i>                                          | 32.6% (8.1%)         | 33.2% (7.0%)           | 34.8% (6.6%)           |                                                                |
| <i>Median (IQR)</i>                                       | 32.7% (27.6%, 39.0%) | 33.7% (27.2%, 37.6%)   | 35.5% (31.0%, 40.4%)   | -1.4% [-3.7%, 0.9%],<br>0.15                                   |
| Standard Deviation (mg/dL)                                |                      |                        |                        |                                                                |
| <i>Mean (SD)</i>                                          | 50.7 (14.4)          | 52.9 (15.3)            | 56.3 (15.8)            |                                                                |
| <i>Median (IQR)</i>                                       | 50.1 (41.3, 60.1)    | 53.5 (42.4, 60.6)      | 55.9 (47.4, 64.2)      | -3.1 [-7.6, 1.4],<br>0.12                                      |
| Percentage of Time in Target Range 70-180 mg/dL >70%      |                      |                        |                        |                                                                |
| <i>n (%)</i>                                              | 19 (54%)             | 21 (60%)               | 13 (37%)               | 21% [2%, 39%],<br>0.03                                         |
| <b>Hypoglycemia</b>                                       |                      |                        |                        |                                                                |
| % Time <54 mg/dL                                          |                      |                        |                        |                                                                |
| <i>Mean (SD)</i>                                          | 0.95% (1.65%)        | 0.53% (0.70%)          | 0.88% (1.27%)          |                                                                |
| <i>Median (IQR)</i>                                       | 0.00% (0.00%, 1.08%) | 0.25% (0.02%, 0.76%)   | 0.35% (0.15%, 1.12%)   | -0.4% [-0.9%, 0.1%],<br>0.11                                   |
| % Time <60 mg/dL                                          |                      |                        |                        |                                                                |
| <i>Mean (SD)</i>                                          | 1.66% (2.65%)        | 0.89% (1.11%)          | 1.64% (2.13%)          |                                                                |

|                                                                                          |                      |                      |                      |                               |
|------------------------------------------------------------------------------------------|----------------------|----------------------|----------------------|-------------------------------|
| <i>Median (IQR)</i>                                                                      | 0.50% (0.00%, 2.36%) | 0.45% (0.07%, 1.13%) | 0.89% (0.26%, 2.19%) | -0.7% [-1.5%, 0.0%],<br>0.07  |
| % Time <70 mg/dL                                                                         |                      |                      |                      |                               |
| <i>Mean (SD)</i>                                                                         | 3.8% (5.3%)          | 1.9% (2.0%)          | 3.8% (4.3%)          |                               |
| <i>Median (IQR)</i>                                                                      | 2.0% (0.1%, 5.5%)    | 1.1% (0.4%, 2.9%)    | 2.4% (0.7%, 5.4%)    | -1.8% [-3.3%, -0.2%],<br>0.03 |
| LBG1                                                                                     |                      |                      |                      |                               |
| <i>Mean (SD)</i>                                                                         | 1.0 (1.2)            | 0.6 (0.5)            | 1.0 (0.9)            |                               |
| <i>Median (IQR)</i>                                                                      | 0.6 (0.2, 1.6)       | 0.4 (0.2, 0.8)       | 0.8 (0.3, 1.3)       | -0.4 [-0.7, -0.06],<br>0.03   |
| Hypoglycemic Event Rate per Week <sup>b</sup>                                            |                      |                      |                      |                               |
| <i>Mean (SD)</i>                                                                         | 1.85 (3.37)          | 0.96 (1.45)          | 1.63 (2.27)          |                               |
| <i>Median (IQR)</i>                                                                      | 0.00 (0.00, 2.42)    | 0.42 (0.00, 1.29)    | 0.82 (0.34, 1.87)    | -0.6 [-1.4, 0.3],<br>0.13     |
| Percentage of Time Below 54 mg/dL <1%                                                    |                      |                      |                      |                               |
| <i>n (%)</i>                                                                             | 25 (71%)             | 29 (83%)             | 26 (74%)             | 9% [-9%, 27%],<br>0.24        |
| Percentage of Time in Target Range 70-180 mg/dL >70% and<br>% of Time Below 54 mg/dL <1% |                      |                      |                      |                               |
| <i>n (%)</i>                                                                             | 13 (37%)             | 19 (54%)             | 9 (26%)              | 27% [9%, 44%],<br>0.006       |
| <b>Hyperglycemia</b>                                                                     |                      |                      |                      |                               |
| % Time >180 mg/dL                                                                        |                      |                      |                      |                               |
| <i>Mean (SD)</i>                                                                         | 30% (21%)            | 28% (16%)            | 33% (19%)            |                               |
| <i>Median (IQR)</i>                                                                      | 26% (16%, 42%)       | 25% (16%, 36%)       | 35% (17%, 46%)       | -4% [-10%, 1%],<br>0.11       |
| % Time >250 mg/dL                                                                        |                      |                      |                      |                               |
| <i>Mean (SD)</i>                                                                         | 8% (12%)             | 8% (9%)              | 10% (10%)            |                               |
| <i>Median (IQR)</i>                                                                      | 4% (0%, 11%)         | 6% (2%, 11%)         | 8% (2%, 17%)         | -2% [-5%, 1%],<br>0.12        |
| % Time >300 mg/dL                                                                        |                      |                      |                      |                               |
| <i>Mean (SD)</i>                                                                         | 3% (6%)              | 3% (4%)              | 4% (6%)              |                               |
| <i>Median (IQR)</i>                                                                      | 0% (0%, 3%)          | 1% (0%, 3%)          | 1% (0%, 5%)          | -1% [-3%, 0.4%],<br>0.11      |
| HBG1                                                                                     |                      |                      |                      |                               |
| <i>Mean (SD)</i>                                                                         | 6.9 (5.2)            | 6.6 (3.9)            | 7.7 (4.8)            |                               |
| <i>Median (IQR)</i>                                                                      | 5.4 (3.7, 8.6)       | 5.3 (4.2, 7.7)       | 7.1 (3.6, 10.4)      | -1.1 [-2.6, 0.4],<br>0.12     |
| Hyperglycemic Event Rate per Week <sup>c</sup>                                           |                      |                      |                      |                               |
| <i>Mean (SD)</i>                                                                         | 2.36 (3.92)          | 2.56 (3.16)          | 2.28 (2.96)          |                               |

| <i>Median (IQR)</i> |                   |                   |                   |                           |
|---------------------|-------------------|-------------------|-------------------|---------------------------|
|                     | 0.00 (0.00, 2.21) | 1.19 (0.76, 2.80) | 1.71 (0.35, 4.15) | -0.3 [-1.5, 0.9],<br>0.55 |

<sup>a</sup> Based on a repeated-measures least squares regression model adjusting for period as fixed effect and site as random effect. The model includes 3 time points: (1) baseline, (2) period 1 outcome, and (3) period 2 outcome. P-values and confidence intervals were adjusted for multiple comparisons using the Two Stage Benjamini-Hochberg adaptive false discovery rate procedure.

<sup>b</sup> An hypoglycemic event is defined as at least 15min <54 mg/dL. An event ends if at least 15min above 70 mg/dL.

<sup>c</sup> An hyperglycemic event is defined as at least 15min >300 mg/dL. An event ends if at least 15min below 250 mg/dL
