# Supplementary material
Source: PubMed Central journal article supplement (PMC9422791)
Supplement: Suppl_TableS3.pdf [file Suppl_TableS3.pdf]

**Supplemental Table 3. HbA1c by Treatment Period**

|                              | Baseline  | AID 13 weeks<br>Overall | SAP 13 weeks<br>Overall | P-Value <sup>b</sup> |
|------------------------------|-----------|-------------------------|-------------------------|----------------------|
|                              | N=35      | N=34 <sup>a</sup>       | N=35                    |                      |
| HbA1c (%)                    | 6.7 ± 1.0 | 6.8 ± 0.8               | 6.8 ± 0.9               | 0.51                 |
| HbA1c <7.0% n (%)            | 25 (71%)  | 19 (56%)                | 22 (63%)                | 0.51                 |
| HbA1c <7.5% n (%)            | 29 (83%)  | 26 (76%)                | 28 (80%)                | 0.51                 |
| Worsening >0.5% <sup>c</sup> | NA        | 7 (21%)                 | 5 (14%)                 |                      |

<sup>a</sup> Lost both the original and back-up sample for one participant at the end of Period 1 (AID)

<sup>b</sup> Based on a repeated-measures least squares regression model adjusting for period as fixed effect and site as random effect. The model includes 3 time points: (1) baseline, (2) period 1 outcome, and (3) period 2 outcome. P-values were adjusted for multiple comparisons using the Two Stage Benjamini-Hochberg adaptive false discovery rate procedure. Note that the FDR procedure resulted in a common p-value for different comparisons.
