# Supplementary material
Source: PubMed Central journal article supplement (PMC9422791)
Supplement: Suppl_TableS4.pdf [file Suppl_TableS4.pdf]

**Supplemental Table 4. Insulin and Weight Metrics by Treatment Period**

|                                                  | <b>Baseline<br/>N=35</b> | <b>AID Use Period<br/>N=35</b> | <b>SAP Use Period<br/>N=35</b> | <b>P-Value <sup>a</sup></b> |
|--------------------------------------------------|--------------------------|--------------------------------|--------------------------------|-----------------------------|
| Total Insulin Units per Kg - <i>Median (IQR)</i> | 0.54 (0.44, 0.74)        | 0.52 (0.43, 0.68)              | 0.52 (0.42, 0.68)              | 0.95                        |
| Bolus:Basal Ratio - <i>Median (IQR)</i>          | 1.13 (0.91, 1.59)        | 0.99 (0.64, 1.94)              | 1.13 (0.84, 1.85)              | 0.95                        |
| Weight in Kg - <i>Median (IQR)</i>               | 84 (75, 97)              | 84 (75, 101)                   | 85 (77, 100)                   | 0.95                        |
| BMI - <i>Median (IQR)</i>                        | 28 (24, 31)              | 29 (25, 32)                    | 29 (25, 32)                    | 0.95                        |

<sup>a</sup> Based on a repeated-measures least squares regression model adjusting for period as fixed effect and site as random effect. The model includes 3 time points: (1) baseline, (2) period 1 outcome, and (3) period 2 outcome. P-values were adjusted for multiple comparisons using the Two Stage Benjamini-Hochberg adaptive false discovery rate procedure. Note that the FDR procedure resulted in a common p-value for different comparisons
