# Supplementary material
Source: PubMed Central journal article supplement (PMC9422791)
Supplement: Suppl_TableS5.pdf [file Suppl_TableS5.pdf]

**Supplemental Table 5. Amount of CGM and Closed-Loop Use by Treatment Period**

|                     | CGM Use            |                    | CL Use             |
|---------------------|--------------------|--------------------|--------------------|
|                     | AID Period<br>N=35 | SAP Period<br>N=35 | AID Period<br>N=35 |
| <b>Overall</b>      |                    |                    |                    |
| <i>Median (IQR)</i> | 93% (88%, 95%)     | 98% (94%, 98%)     | 82% (61%, 91%)     |
| <i>Range</i>        | 61% to 97%         | 86% to 99%         | 29% to 94%         |
| <b>By Month</b>     |                    |                    |                    |
| <b>Month 1</b>      |                    |                    |                    |
| <i>Median (IQR)</i> | 93% (90%, 96%)     | 98% (95%, 99%)     | 82% (67%, 90%)     |
| <i>Range</i>        | 58% to 98%         | 87% to 99%         | 36% to 96%         |
| <b>Month 2</b>      |                    |                    |                    |
| <i>Median (IQR)</i> | 94% (88%, 95%)     | 98% (92%, 99%)     | 82% (60%, 92%)     |
| <i>Range</i>        | 56% to 98%         | 79% to 99%         | 16% to 95%         |
| <b>Month 3</b>      |                    |                    |                    |
| <i>Median (IQR)</i> | 89% (84%, 92%)     | 94% (91%, 95%)     | 77% (55%, 88%)     |
| <i>Range</i>        | 56% to 94%         | 73% to 96%         | 21% to 91%         |
