# Supplementary material
Source: PubMed Central journal article supplement (PMC9422791)
Supplement: Suppl_TableS6.pdf [file Suppl_TableS6.pdf]

**Supplemental Table 6. Adverse Events**

|                                                    | Pre-Randomization<br>(N=10) | During AID Use<br>Period<br>(N=35) | During SAP Use Period<br>(N=35) |
|----------------------------------------------------|-----------------------------|------------------------------------|---------------------------------|
| <b>Any Reportable Adverse Event<sup>a</sup></b>    |                             |                                    |                                 |
| Number of Events                                   | 1                           | 6                                  | 1                               |
| Participants with ≥ 1 Event                        | 1 (10%)                     | 5 (14%)                            | 1 (3%)                          |
| <b>Specific Events – # Participants [# Events]</b> |                             |                                    |                                 |
| Hyperglycemia                                      | 0 [0]                       | 3 [3]                              | 0 [0]                           |
| Hypoglycemia                                       | 0 [0]                       | 0 [0]                              | 1 [1]                           |
| Ketosis                                            | 0 [0]                       | 1 [1]                              | 0 [0]                           |
| Medical Device Site Bleeding                       | 0 [0]                       | 1 [1]                              | 0 [0]                           |
| COVID-19                                           | 1 [1]                       | 1 [1]                              | 0 [0]                           |
| Days with Ketone Values ≥1.5 mmol/L                |                             | 1                                  | 0                               |

<sup>a</sup> Reportable adverse events include:

- An SAE
- An adverse device effect (ADE)
- An adverse event occurring in association with study procedure
- An adverse event which leads to the discontinuation of a study device for two or more hours
- Hypoglycemia meeting the definition of severe hypoglycemia
- Diabetic ketoacidosis
