# Supplementary material
Source: PubMed Central journal article supplement (PMC9422791)

**Supplemental Figure 2. Flowchart of Study Completion**

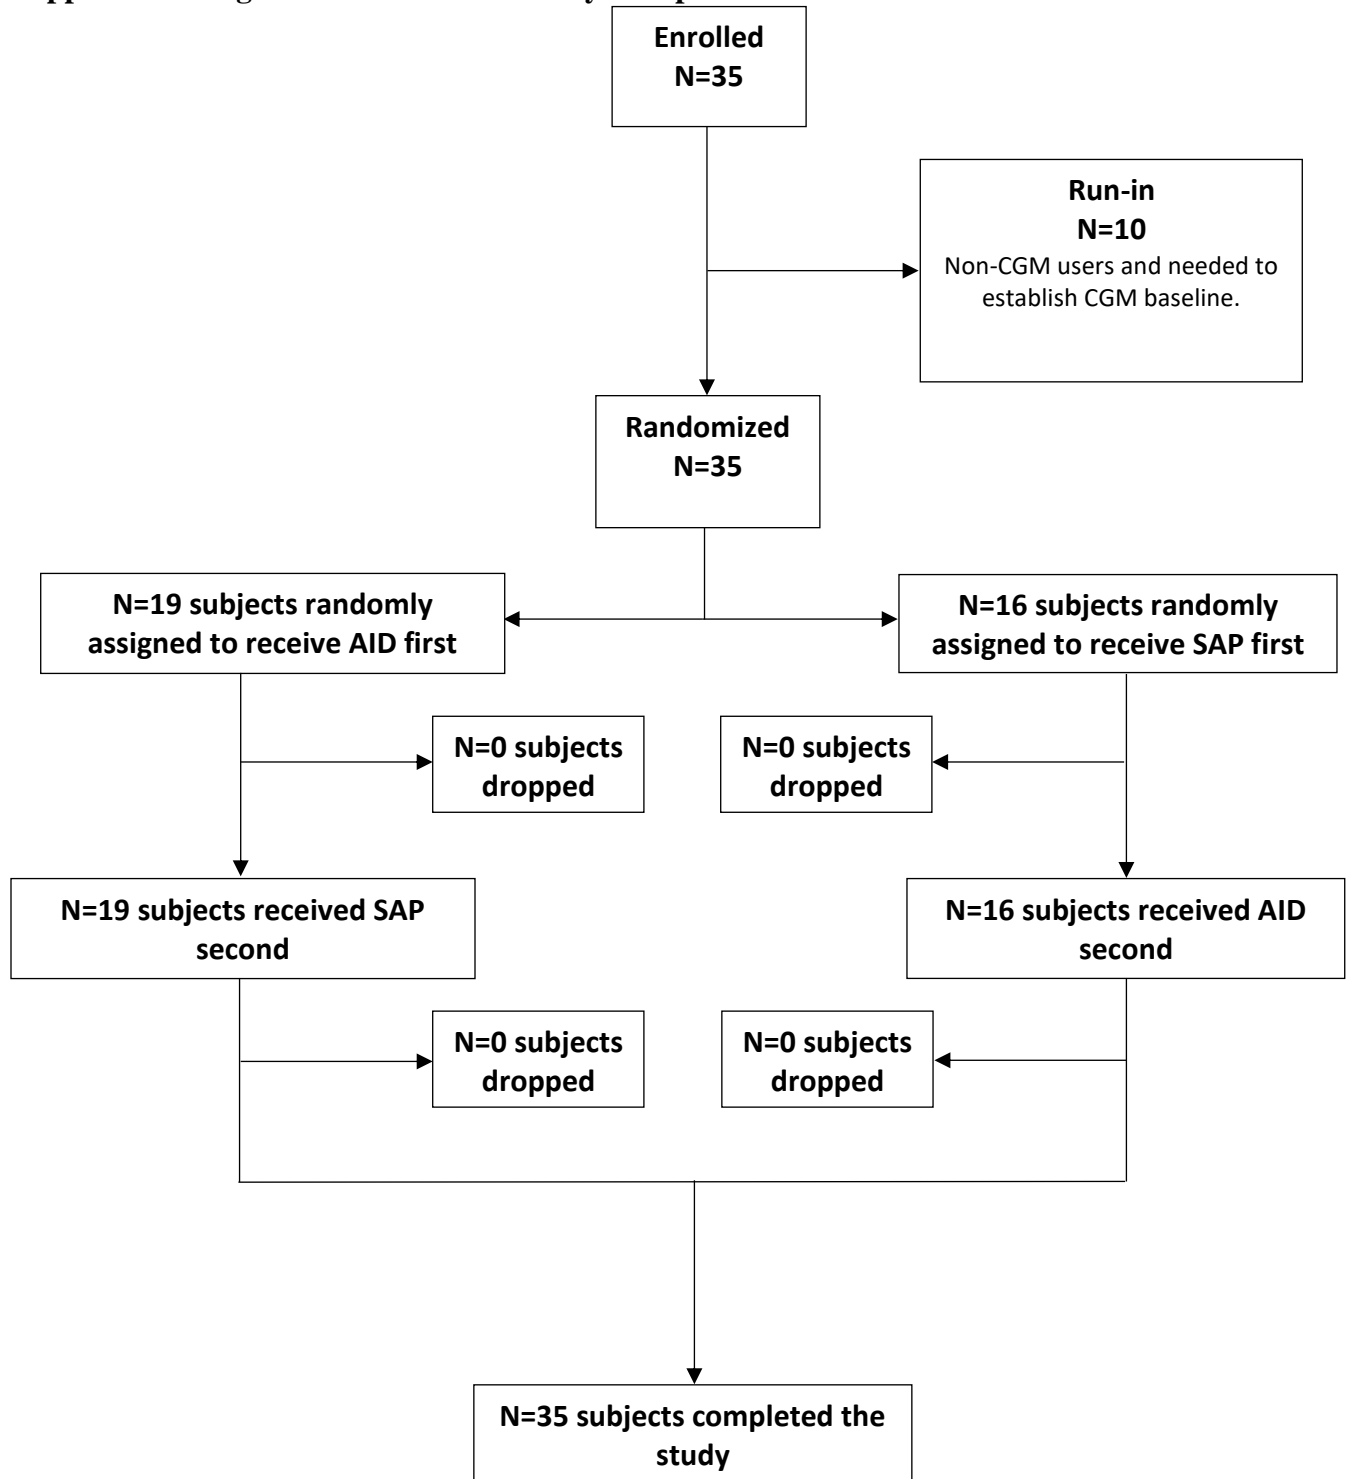

Supplement: Suppl_FigS2.pdf [file Suppl_FigS2.pdf]
